# Supplementary material for: Effect of the blocked-sites phenomenon on the heterogeneous reaction of pyrene with N2O5/NO3/NO2
Source: Royal Society of Chemistry journal article supplement (doi:10.1039/c5ra24368h), 2016-01-01
Supplement: c5ra24368h1.pdf [file c5ra24368h1.pdf]

1 **Supporting Information**

2

3

4

5 **Effect of the Blocking Sites Phenomenon on the**  
6 **Heterogeneous Reaction of Pyrene with N<sub>2</sub>O<sub>5</sub>/NO<sub>3</sub>/NO<sub>2</sub>**

7 *Peng Zhang<sup>†,\*</sup>, Wanqi Sun<sup>†</sup>, Bo Yang<sup>†</sup>, Jinian Shu<sup>†</sup>, and Liang Dong<sup>‡</sup>*

8 <sup>†</sup>State Key Joint Laboratory of Environment Simulation and Pollution Control,  
9 Research Center for Eco-Environmental Sciences, Chinese Academy of Sciences,  
10 Beijing 100085, China

11 <sup>‡</sup>National Research Center for Environmental Analysis and Measurement, Beijing  
12 100029, China

13 \*Corresponding author: [pengzhang@rcees.ac.cn](mailto:pengzhang@rcees.ac.cn)

14

15

16

17

18 Number of pages: 6

19 Number of figures: 4

20 **1. Collecting and analyzed of products**

\* Corresponding author. Tel.: +86 010 62849087; Fax: +86 010 6292 3563.

*E-mail address:* [pengzhang@rcees.ac.cn](mailto:pengzhang@rcees.ac.cn)

<sup>†</sup>Research Center for Eco-Environmental Sciences, Chinese Academy of Sciences

<sup>‡</sup>National Research Center for Environmental Analysis and Measurement, Beijing, China

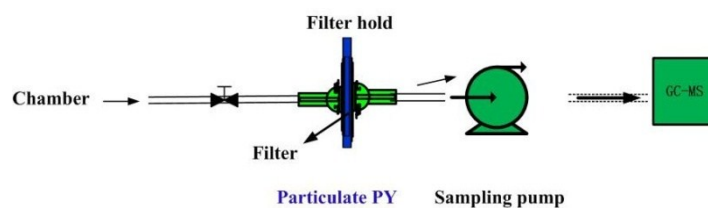

21

22

Figure S1. The schematic diagram of collecting procedure

## 23 2. The partitioning ratio of PY

24 The particulate PY and gas-phase PY were microfiber filter (25 mm diameter,  
 25 0.7  $\mu\text{m}$  pore-size, Whatman)—liquid nitrogen washing ( Figure S2). The collected PY  
 26 were extracted with  $\sim 20$  ml dichloromethane and analyzed using GC-MS. The  
 27 partitioning ratio of pyrene between the gas and particle phase under our experimental  
 28 condition was estimated to 0.2 be according to the relative signal intensities of gas-  
 29 phase and particulate PY observed using GC-MS.

30

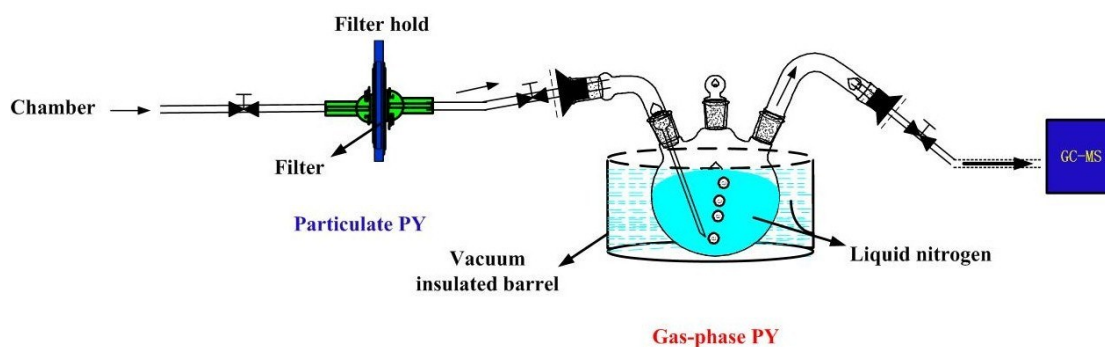

31

32

Figure S2. The schematic diagram of collecting procedure

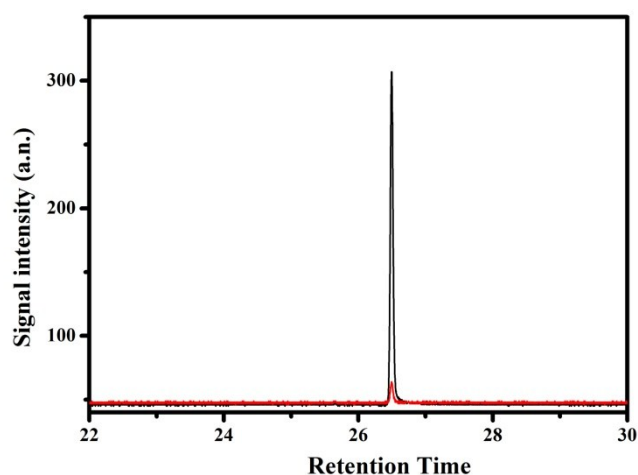

33

34 **Figure S3.** The signal intensity of gas-phase (red line) and particulate PY (black line)

### 35 3. Estimation of Oxidants Concentrations

#### 36 3.1 Estimation of initial $N_2O_5$ concentration

37 The amount of  $N_2O_5$  delivered in experiments was determined by the temperature  
 38 of the  $N_2O_5$  trap (243 K in our experiments) and its vapor pressure under this  
 39 temperature. The initial gas-phase  $N_2O_5$  concentration in the chamber was calculated  
 40 using the equation (2).

$$41 \quad [N_2O_5]_0 = \frac{qtT_{chamber}P_t}{V_{chamber}T_{bathe}P_0} \quad (1)$$

42  $[N_2O_5]_0$  is the initial  $N_2O_5$  concentration,  $P_t$  and  $P_0$  is the vapor pressure of  
 43  $N_2O_5$  (~40 Pa) at 243 K and the standard atmospheric pressure (~101306 Pa),  
 44 respectively.  $V_{chamber}$  represents the volume of the reaction chamber used in our  
 45 experiment, respectively.  $T_{chamber}$  and  $T_{bathe}$  are the temperatures of the chamber (286  
 46 K) and the cooling bath (243 K).  $q$  is the flow rate of  $N_2$  (~0.6 L min<sup>-1</sup>),  $t$  is the filling  
 47 time (3~5 min).

### 48 3.2 Estimation of the $[\text{NO}_3]/[\text{N}_2\text{O}_5]$ ratio in the absence of $\text{O}_3$

49 The  $\text{NO}_3$  concentration in the chamber was estimated by probing the decay of  
50 the isoprene.  $\sim 200$  ppbv isoprene was added into the chamber before introducing  
51  $\text{N}_2\text{O}_5/\text{NO}_3/\text{NO}_2$  mixture. The decay of isoprene was on-line monitored using VUV-  
52 GTOFMS (Figure S4). The  $\text{NO}_3$  radical concentration in the absence of  $\text{O}_3$  are  
53 calculated with the following equations (3–6).

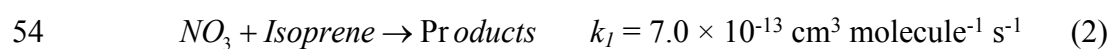

55 
$$-\frac{d[\text{Isoprene}]}{dt} \rightarrow k_1[\text{Isoprene}][\text{NO}_3] \quad (3)$$

56 
$$\ln\left(\frac{[\text{Isoprene}]_t}{[\text{Isoprene}]_0}\right) = -k_1[\text{NO}_3]t \quad (4)$$

57 
$$[\text{NO}_3] = \frac{\ln\left(\frac{[\text{Isoprene}]_t}{[\text{Isoprene}]_0}\right)}{-k_1t} \quad (5)$$

58  $t$  is the reaction time.  $([\text{Isoprene}]_t/[\text{Isoprene}]_0)$  is the loss ratio of isoprene during  
59 this period. The average  $\text{NO}_3$  radical concentrations in the reaction processes was  
60 calculated to be  $\sim 3.0 \times 10^{10} \text{ molecules cm}^{-3}$ .

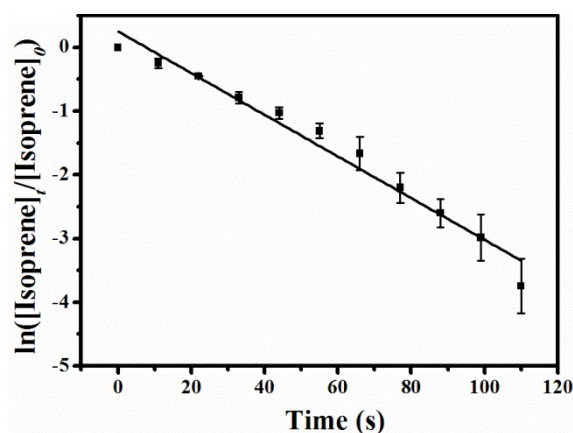

61

62 Figure S4. The isoprene decay curves by exposure to  $\text{N}_2\text{O}_5/\text{NO}_3/\text{NO}_2$ . The error bars

63 are obtained from three duplicate experiments.

64 Based on the obtained  $\text{NO}_3$  level and the temperature dependent equilibrium  
 65 constant  $K_{eq}$  shown in equation (7) (Sander et al., 2003), the  $\text{N}_2\text{O}_5$  concentration was  
 66 calculated to be  $\sim 2.0 \times 10^{14}$  molecules  $\text{cm}^{-3}$ .

$$67 \quad K_{eq} = \frac{[\text{N}_2\text{O}_5]}{[\text{NO}_2][\text{NO}_3]} = 3 \times 10^{-27} \exp(10990/T) \quad (7)$$

68  $[\text{N}_2\text{O}_5]$ ,  $[\text{NO}_3]$ , and  $[\text{NO}_2]$  are the concentrations of  $\text{N}_2\text{O}_5$ ,  $\text{NO}_3$ , and  $\text{NO}_2$ , respectively.

### 69 3.3 Estimation of the $[\text{NO}_3]/[\text{N}_2\text{O}_5]$ ratio in the presence of $\text{O}_3$

70 The  $\text{NO}_3$  radical concentration in the presence of  $\text{O}_3$  could not be estimated  
 71 according to the decay of isoprene because part of isoprene was also consumed by  $\text{O}_3$   
 72 in the chamber. Although the  $\text{N}_2\text{O}_5(\text{g}) \rightleftharpoons \text{NO}_2(\text{g}) + \text{NO}_3(\text{g})$  reaction was derived to  
 73  $\text{NO}_3$  radical using  $\text{O}_3$ , the new equilibrium in the  $\text{N}_2\text{O}_5/\text{NO}_3/\text{NO}_2$  system was  
 74 assumed to be established in the presence of  $\text{O}_3$ . Both  $\text{NO}_3$  radical and  $\text{N}_2\text{O}_5$   
 75 concentration could be calculated using the following equation:

$$76 \quad \frac{[\text{N}_2\text{O}_5]^*}{[\text{NO}_2]^*[\text{NO}_3]^*} = \frac{[\text{N}_2\text{O}_5] - k_{\text{O}_3+\text{NO}_2}[\text{O}_3][\text{NO}_2]^*}{[\text{NO}_2]^*([\text{NO}_3] + k_{\text{O}_3+\text{NO}_2}[\text{O}_3][\text{NO}_2]^*)} = K_{eq} \quad (8)$$

77 where  $[\text{N}_2\text{O}_5]^*$ ,  $[\text{NO}_3]^*$ , and  $[\text{NO}_2]^*$  are the concentrations of  $\text{N}_2\text{O}_5$ ,  $\text{NO}_3$ , and  $\text{NO}_2$ ,  
 78 respectively, in the new equilibrium system.  $k_{\text{O}_3+\text{NO}_2}[\text{O}_3][\text{NO}_2]^*$  is the production rate  
 79 of the  $\text{NO}_3$  radical ( $k_{\text{O}_3+\text{NO}_2} = 1.4 \times 10^{-13} \exp(-2490/T)$ )(Atkinson et al., 2004). Based  
 80 on the iteration method,  $[\text{NO}_3]^*$ ,  $[\text{N}_2\text{O}_5]^*$ ,  $[\text{NO}_2]^*$ , the  $[\text{NO}_3]/[\text{N}_2\text{O}_5]$  ratio have been  
 81 calculated and shown in Table 1.

## 82 References

83 Sander, S. P., Friedl, R. R., Ravishankara, A. R., Golden, D. M., Kolb, C. E., Kurylo,

84 M. J., Huie, R. E., Orkin, V. L., Molina, M. J., Moortgat G. K., and Finlayson-Pitts, B.  
85 J. Chemical Kinetics and Photochemical Data for Use in Atmospheric Studies,  
86 Evaluation Number 14. NASA/JPL: Pasadena, CA, **2003**; Vol. 02-25.

87 Atkinson, R.; Baulch, D.; Cox, R.; Crowley, J.; Hampson, R.; Hynes, R.; Jenkin, M.;  
88 Rossi, M.; Troe, J., Evaluated kinetic and photochemical data for atmospheric  
89 chemistry: Volume I-gas phase reactions of O<sub>x</sub>, HO<sub>x</sub>, NO<sub>x</sub> and SO<sub>x</sub> species. *Atmos.*  
90 *Chem. Phys.* **2004**, 4 (6), 1461-1738.

91 Zhang, P.; Sun, W.; Li, N.; Wang, Y.; Shu, J.; Yang, B.; Dong, L., Effects of  
92 Humidity and [NO<sub>3</sub>]/[N<sub>2</sub>O<sub>5</sub>] Ratio on the Heterogeneous Reaction of Fluoranthene  
93 and Pyrene with N<sub>2</sub>O<sub>5</sub>/NO<sub>3</sub>/NO<sub>2</sub>. *Environ. Sci. Technol.* **2014**, 48, (22), 13130-13137.

94 Yang, B.; Meng, J.; Zhang, Y.; Liu, C.; Gan, J.; Shu, J., Experimental studies on the  
95 heterogeneous reaction of NO<sub>3</sub> radicals with suspended carbaryl particles. *Atmos.*  
96 *Environ.* **2011**, 45, (12), 2074-2079.
